# Supplementary material
Source: publisher figshare collection journal article supplement (https://acs.figshare.com/ndownloader/files/3757336)
Supplement: Supplementary file 1 [file 3757336]

## Supporting Information

### Phase-Tunable Calcium Phosphate Biomaterials Synthesis and Application in Protein Delivery

Chi Ching Lau,<sup>†</sup> Philip James Thomas Reardon,<sup>†</sup> Jonathan Campbell Knowles,<sup>‡,§</sup> and Junwang Tang<sup>\*,†</sup>

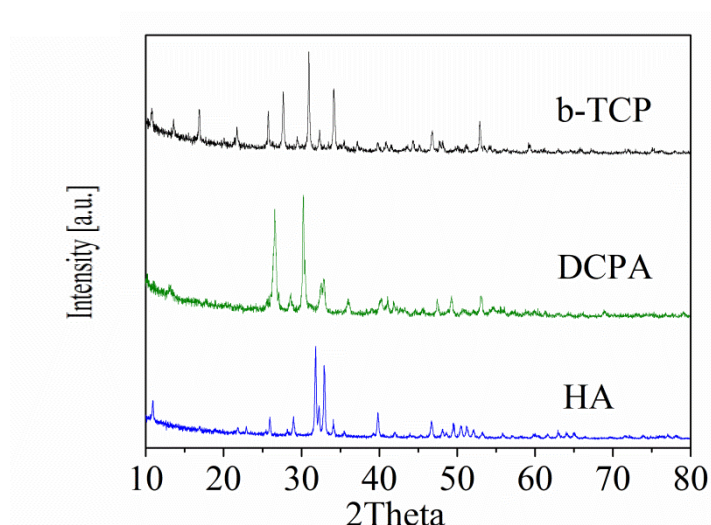

**S1.** X-ray diffraction patterns (XRD) of CaP samples prepared using microwave heating at 200°C for one hour. Phases were readily controlled by the solvents used, e.g. methanol ( $\beta$ -TCP), ethanol (DCPA) and water (HA).

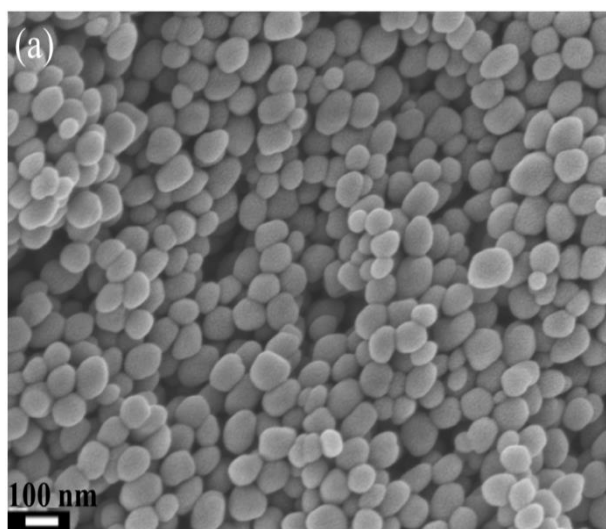

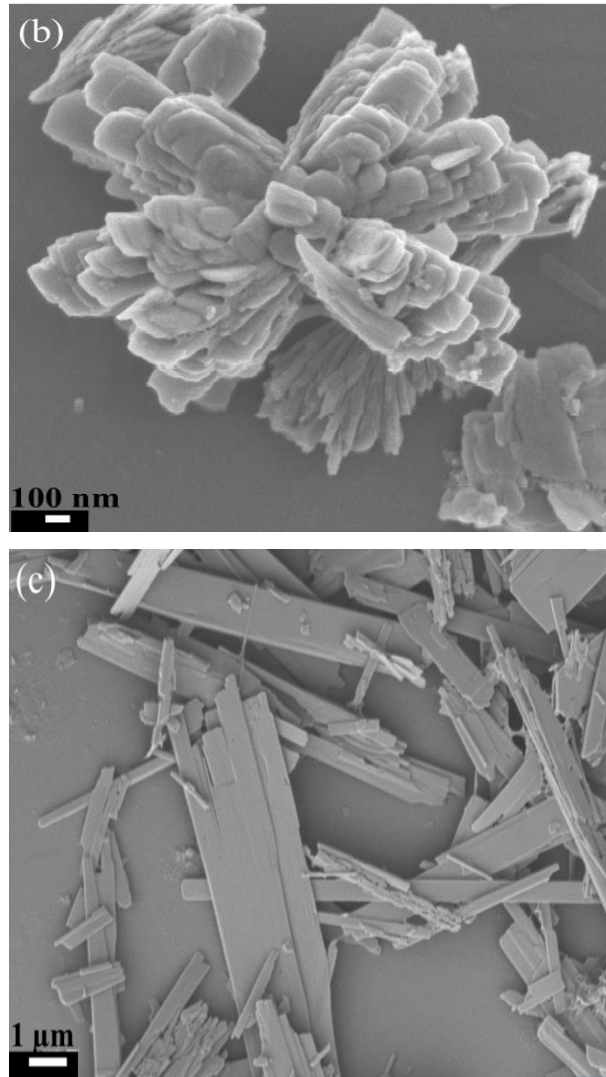

**S2.** SEM images of (a)  $\beta$ -TCP, (b) DCPA and (c) HA that synthesised in methanol, ethanol and water, respectively at 200 °C with one hour reaction time using microwave method.

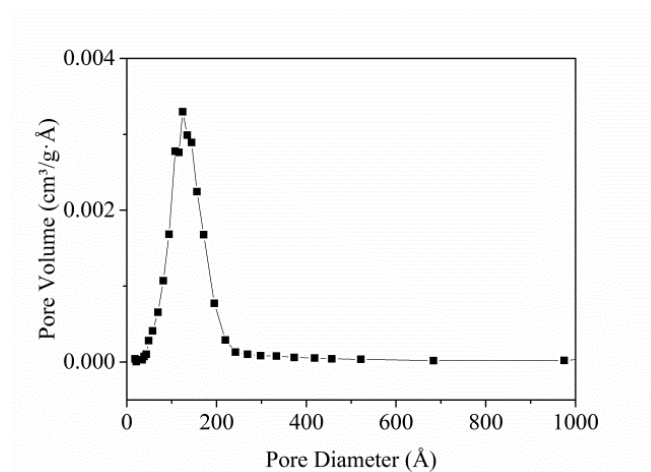

**S3.** Pore size distribution of  $\beta$ -TCP synthesised at 200 °C after 30 minutes reaction time in microwave.

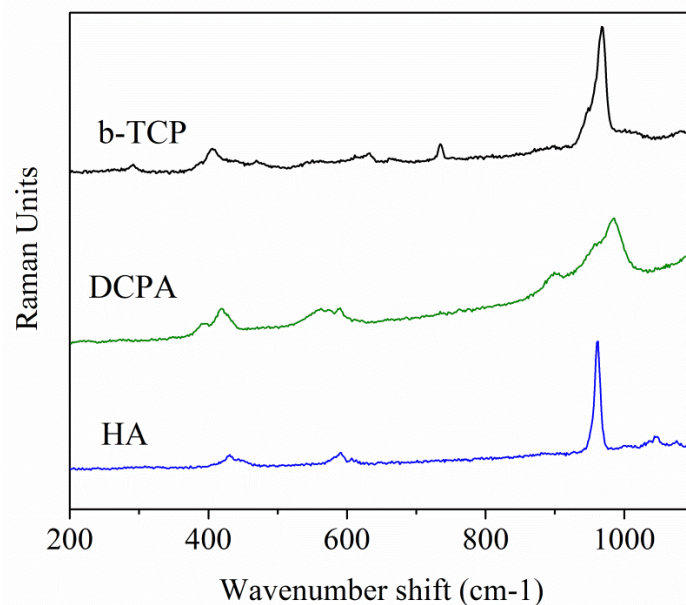

**S4.** Raman spectra of  $\beta$ -TCP, DCPA and HA samples synthesized at 200 °C after one hour reaction time via microwave method.

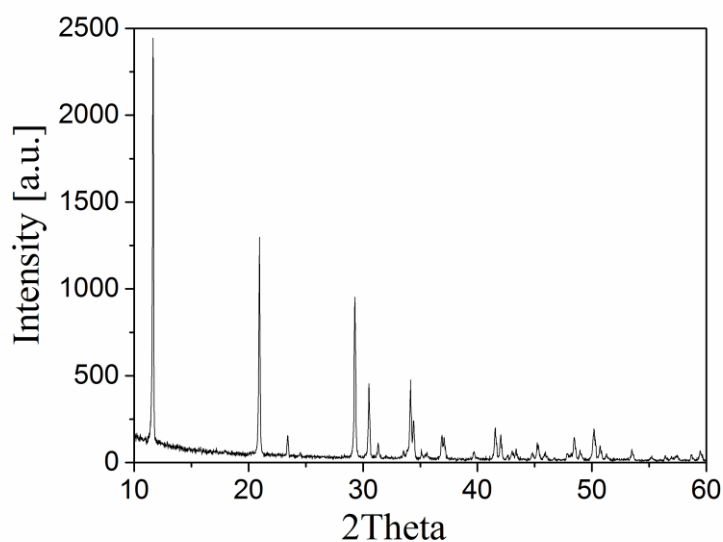

**S5.** X-ray diffraction pattern (XRD) of brushite ( $\text{CaHPO}_4 \cdot 2\text{H}_2\text{O}$ ) was obtained after mixing the precursors (calcium acetate monohydrate and phosphoric acid) in water at room temperature.

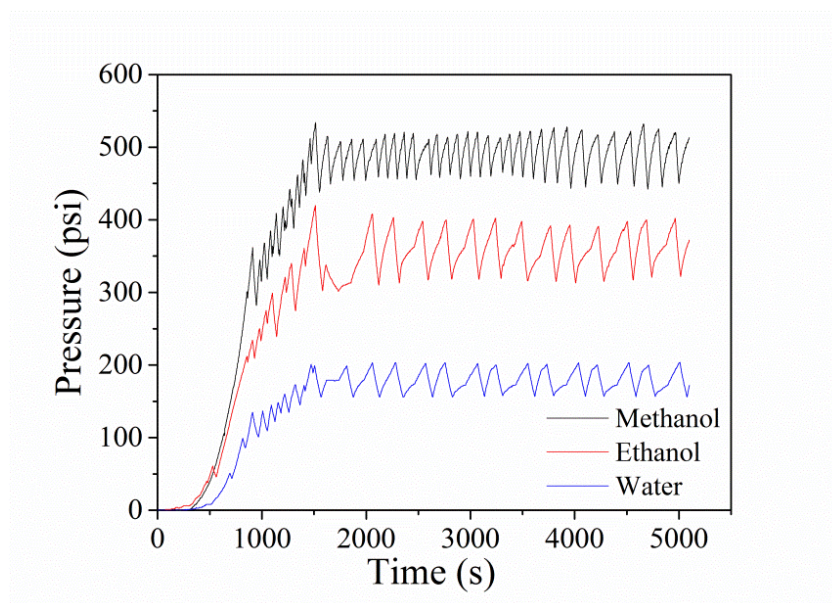

**S6.** Pressure profiles for all solvents (methanol, ethanol and water) at 200 °C with 60 minutes of reaction time via microwave heating method.
